# Supplementary material for: AtKATANIN1 Modulates Microtubule Depolymerization and Reorganization in Response to Salt Stress in Arabidopsis
Source: MDPI journal article supplement (doi:10.3390/ijms21010138), 2019-12-24
Supplement: s1 [file s1]

1 **AtKATANIN1 modulates microtubule depolymerization and reorganization in response**  
2 **to salt stress in *Arabidopsis***

3 **Jie Yang<sup>1</sup>, Bang An<sup>1</sup>, Hongli Luo<sup>1</sup>, Chaozu He<sup>1</sup>, Qiannan Wang<sup>1\*</sup>**

4 **<sup>1</sup>Hainan Key Laboratory for Sustainable Utilization of Tropical Bioresource, College of**  
5 **Tropical Crops, Hainan University, Haikou 570228, China**

6

7 **Supplemental material**

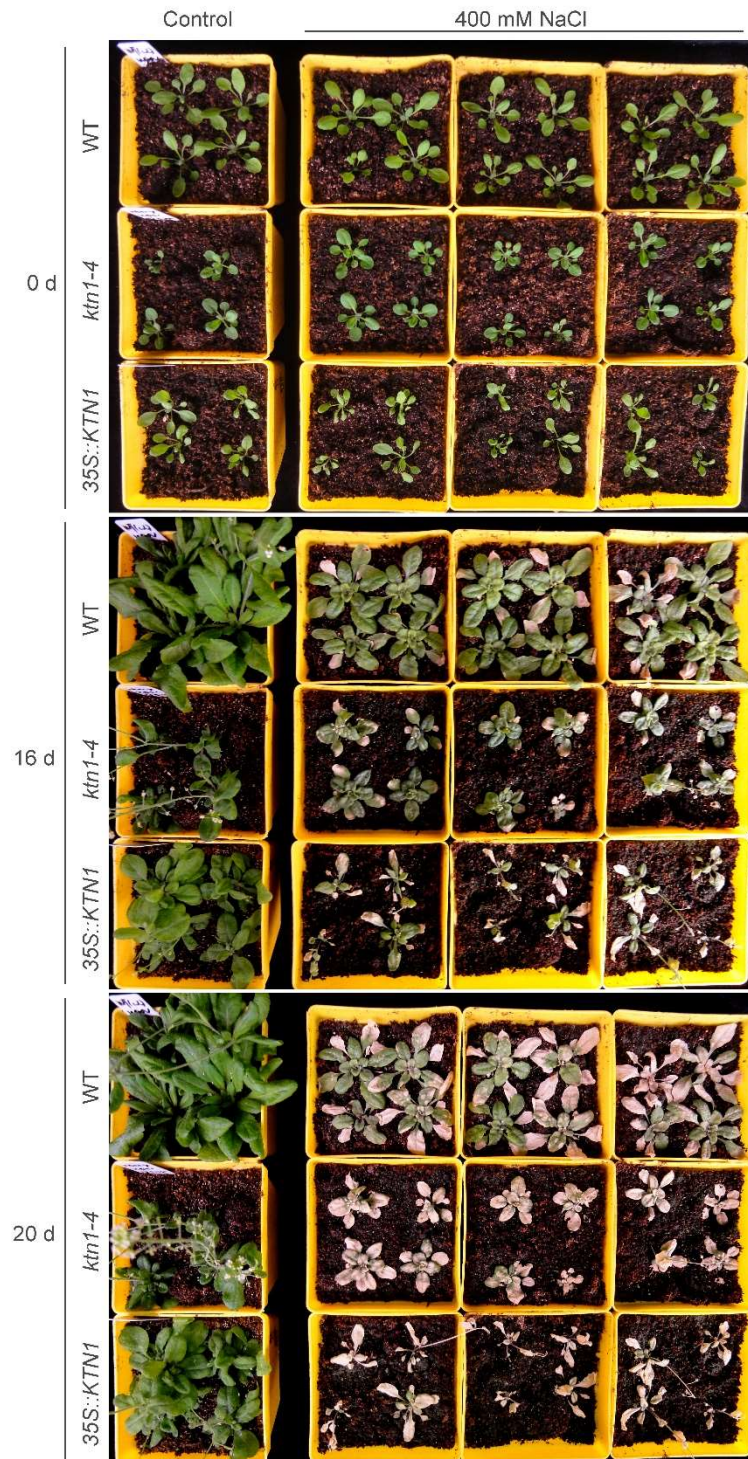

**Figure S1. Both knock-out and overexpression of *AtKTN1* caused lower salt tolerance of seedlings in soil.**

Four-week-old seedlings grown in soil were flood irrigated with water or 400 mM NaCl every 4 days. Images were taken at 16 d and 20 d after salt treatment respectively.

15 **Table S1. List of the primers used in this study.**

16

| Primer name               | Sequence (5' to 3')      |
|---------------------------|--------------------------|
| <i>AtKTN1</i> genomic For | GTCGACATGGTGGGAAGTAGTAAT |
| <i>AtKTN1</i> genomic Rev | GAATTCTTAAGCAGATCCAAACTC |
| <i>eIF4A</i> For          | CAGAGAACACTCCAACCTGAATC  |
| <i>eIF4A</i> Rev          | GGGTATCTATGCTTACGGTTTCG  |
| <i>QRT AtKTN1</i> For     | CCCTGTTGGCAAAAGCTGTT     |
| <i>QRT AtKTN1</i> Rev     | GCATATGCCCTAGCCAGATCA    |
| <i>QRT AtRD22</i> For     | CCCATTTCGCGGTGTTCTACT    |
| <i>QRT At RD22</i> Rev    | CCAAGTGGTTTGGGTTCCTCA    |
| <i>QRT AtKIN1</i> For     | GCTGGCAAAGCTGAGGAGAA     |
| <i>QRT AtKIN1</i> Rev     | CCGGTCTTGTCTTCACGAA      |
| <i>QRT AtCOR15A</i> For   | GTGACGGCAACATCCTCGAT     |
| <i>QRT AtCOR15A</i> Rev   | CCCAATGTATCTGCGGTTTCA    |
| <i>QRT eIF4A</i> For      | CGTAAGCATAGATACCCCTAAGAA |
| <i>QRT eIF4A</i> Rev      | TGACCAGAGGCTGAATGAAGT    |

17

**Movie S1.-S3. Time-lapse movies of microtubule severing in cotyledon pavement cells of GFP-TUA6 labeled WT (Movie S1.), *ktn1-4* (Movie S2.) and 35S::*KTN1* (Movie S3.) seedlings corresponds to the diagram shown in Figure 3A.**

Images were collected at 4-s intervals and compressed into a movie with a display rate of 5 frames per second. The growing end of microtubule of interest is indicated by a yellow arrowhead, while the severing site and the broken end is marked by a red arrowhead. Scale bars= 5  $\mu$ m.
